# Supplementary material
Source: PubMed Central journal article supplement (PMC5496781)

1 **Online Repository**

2 **Supplement to:** Detection of phosphoglucomutase-3 (PGM3) deficiency by lectin-based flow  
3 cytometry

4

5 **Table of Contents:**

6       METHODS .....2  
7       FIGURES .....4  
8       REFERENCES .....5

9

10

11 **METHODS**

12 **Human subjects**

13 All patients provided informed consent on NIH IRB-approved research protocols designed to  
14 study atopy (NCT01164241), hyper-IgE syndromes (NCT00006150), or known or suspected  
15 congenital disorders of glycosylation (NCT00369421 and NCT02089789). Clinical histories,  
16 review of available outside records, and clinical evaluations were all performed at the Clinical  
17 Center of the National Institutes of Health (NIH). Clinical immunologic laboratory tests were  
18 performed by the Department of Laboratory Medicine at NIH, Bethesda, MD.

19

20 **Lectin flow cytometric assays**

21 Peripheral blood mononuclear cells (PBMCs) were separated by Ficoll (Ficoll-Paque PLUS; GE  
22 Healthcare) gradient centrifugation. Cells were surface stained with Live/Dead Fixable Blue  
23 viability dye (Invitrogen, Carlsbad, Calif), anti-CD19 APC, anti-CD11c v450, anti-CD3 AF700,  
24 anti-CD56 PE-Cy7, anti-CD4 BV711, anti-CD8 APC-H7 (BD Biosciences, San Jose, CA), and  
25 anti-CD45RO TRPE (Beckman-Coulter, Pasadena, CA). Fluorescein conjugated L-  
26 phytohemagglutinin (L-PHA) or concanavalin A (Con A) (Vector Laboratories, Burlingame,  
27 CA) were used to stain *N*-glycans. Where indicated, PBMCs were treated with 100 units/ $\mu$ l of  
28 glycerol free PNGase F (N-glycosidase F) (New England Biolabs, Ipswich, MA) in 20 $\mu$ L HBSS  
29 at 37°C for 1 hour prior to surface staining with antibodies and L-PHA. Cells were washed,  
30 fixed with 4% paraformaldehyde and 200,000 events per condition were collected on an LSR  
31 Fortessa (BD Biosciences). All events were analyzed using FlowJo software (Treestar, Ashland,  
32 OR), and are gated on live single cells as shown in Fig S2.

33

34 **Nucleotide Sugar Quantification**

35 High performance anion exchange chromatography (HPAEC) was performed on a Dionex ICS-  
36 5000 with a CarboPac PA1 column 2x250 and PA1 2x50 guard column (ThermoFisher,  
37 Waltham, MA). Isolated PBMCs were washed with PBS, and the resulting pellet was lysed in  
38 75% ethanol (100 $\mu$ l/1x10<sup>6</sup> cells) by cuphorn sonication. After sonication, the suspension was  
39 centrifuged, the supernatant was saved and the solvent was removed by Savant SpeedVac  
40 (ThermoFisher). The concentrated residue was resuspended in an appropriate volume of 40 mM  
41 sodium phosphate buffer and any insoluble material removed by centrifugation.

42 HPAEC analysis was performed by as described (E5). Briefly, 10  $\mu$ L of lysate was  
43 injected into a 10  $\mu$ L sample loop and species were separated on the column utilizing a  
44 combination of two eluents: A= 1mM NaOH B= 1mM NaOH/1M NaOAc. HPAEC was run  
45 with a flow rate of 0.25 mL/min and the following gradient elution was utilized: T<sub>0min</sub> = 2% B,  
46 T<sub>10min</sub> = 30%B, T<sub>15min</sub> = 30%B, T<sub>16min</sub> = 55%B, T<sub>30min</sub> = 55%B, T<sub>33min</sub> = 100%B, T<sub>50min</sub> =  
47 100%B, T<sub>55min</sub> = 2%B, T<sub>65min</sub> = 2%B. Standards [UDP-GalNAc and UDP-GlcNAc (Sigma-  
48 Alrich, Saint Lous, MO)] were dissolved to 1 mM in 100 mM sodium phosphate buffer and then  
49 diluted for standard curves. Samples were compared to standard curves and UDP-HexNAc  
50 concentrations defined. Due to a large signal corresponding to ADP in some UV traces, PAD  
51 was utilized for quantitation. UV absorbance collected at 260 nm and ED detection done with  
52 IntAmp and AgCl electrode using Gold Standard PAD waveform.

53 **FIGURES**

54 **Figure E1. Discrete differences in *N*-glycan complexity exist among PGM3 deficient**

55 **leukocyte populations.** (A) MFI of L-PHA in total T cells (CD3<sup>+</sup>), natural killer cells (CD56<sup>+</sup>),  
56 CD45RO<sup>-</sup> and CD45RO<sup>+</sup> CD8<sup>+</sup> cells, B cells (CD19<sup>+</sup>), and CD11c<sup>+</sup> cells from the same cohort as  
57 in Figure 1. Surface markers were used to identify T cells (CD3<sup>+</sup>), natural killer cells (CD56<sup>+</sup>),  
58 CD8<sup>+</sup> CD45RO<sup>-</sup> T cells, CD8<sup>+</sup> CD45RO<sup>+</sup> T cells, B cells (CD19<sup>+</sup>), and CD11c<sup>+</sup> cells. Mann-  
59 Whitney test; \*\*P<0.01, \*\*\*\*P<0.0001.

60

61 **Figure E2. Gating strategy for defining leukocyte subsets.** PBMCs were gated by forward and

62 side scatter and cell clusters were excluded by side scatter. All dead cells were excluded using  
63 viability dye, and remaining populations were divided into CD3<sup>+</sup> and CD3<sup>-</sup> groups. Natural killer  
64 cells (defined as CD56<sup>+</sup>), B cells (defined as CD19<sup>+</sup>), and CD11c<sup>+</sup> cells were identified from the  
65 CD3<sup>-</sup> group. CD3<sup>+</sup> T cells were further divided into CD4<sup>+</sup> or CD8<sup>+</sup> populations, and then into  
66 CD45RO<sup>+</sup> or CD45RO<sup>-</sup> groups.

67

68 **Figure E3. Total *N*-glycan expression appears preserved in PGM3 deficient leukocyte sub-**

69 **sets.** (A) Schematic of complex- (top) and hybrid-type (bottom) branching *N*-glycans showing  
70  $\alpha$ -mannose residues bound by concanavalin A (Con A) indicated in red dashed boxes. Mean  
71 fluorescent intensity (MFI) of Con A staining of PBMCs, total T cells, CD45RO<sup>-</sup> CD4 and CD8,  
72 CD45RO<sup>+</sup> CD4 and CD8, natural killer cells (CD56<sup>+</sup>), B cells (CD19<sup>+</sup>), and CD11c<sup>+</sup> cells  
73 isolated from control individuals (n = 7), as well as atopic dermatitis (AD, n = 3) and PGM3  
74 deficient individuals (n = 3). Mann-Whitney test.

75

76

77 **REFERENCES**

- 78 E1. Matthijs G, Schollen E, Pardon E, Veiga-Da-Cunha M, Jaeken J, Cassiman JJ, et al.  
79 Mutations in PMM2, a phosphomannomutase gene on chromosome 16p13, in carbohydrate-  
80 deficient glycoprotein type I syndrome (Jaeken syndrome). *Nat Genet.* 1997;16(1):88-92.  
81 E2. Grubenmann CE, Frank CG, Kjaergaard S, Berger EG, Aebi M, Hennet T. ALG12  
82 mannosyltransferase defect in congenital disorder of glycosylation type Ig. *Hum Mol Genet.*  
83 2002;11(19):2331-9.  
84 E3. De Praeter CM, Gerwig GJ, Bause E, Nuytinck LK, Vliegthart JFG, Breuer W, et al. A  
85 Novel Disorder Caused by Defective Biosynthesis of N-Linked Oligosaccharides Due to  
86 Glucosidase I Deficiency. *The American Journal of Human Genetics.* 2000;66(6):1744-56.  
87 E4. Enns GM, Shashi V, Bainbridge M, Gambello MJ, Zahir FR, Bast T, et al. Mutations in  
88 NGLY1 cause an inherited disorder of the endoplasmic reticulum-associated degradation  
89 pathway. *Genet Med.* 2014;16(10):751-8.  
90 E5. Yu SH, Bond MR, Whitman CM, Kohler JJ. Metabolic labeling of glycoconjugates with  
91 photocrosslinking sugars. *Methods Enzymol.* 2010;478:541-62.

92

93

Figure E1.

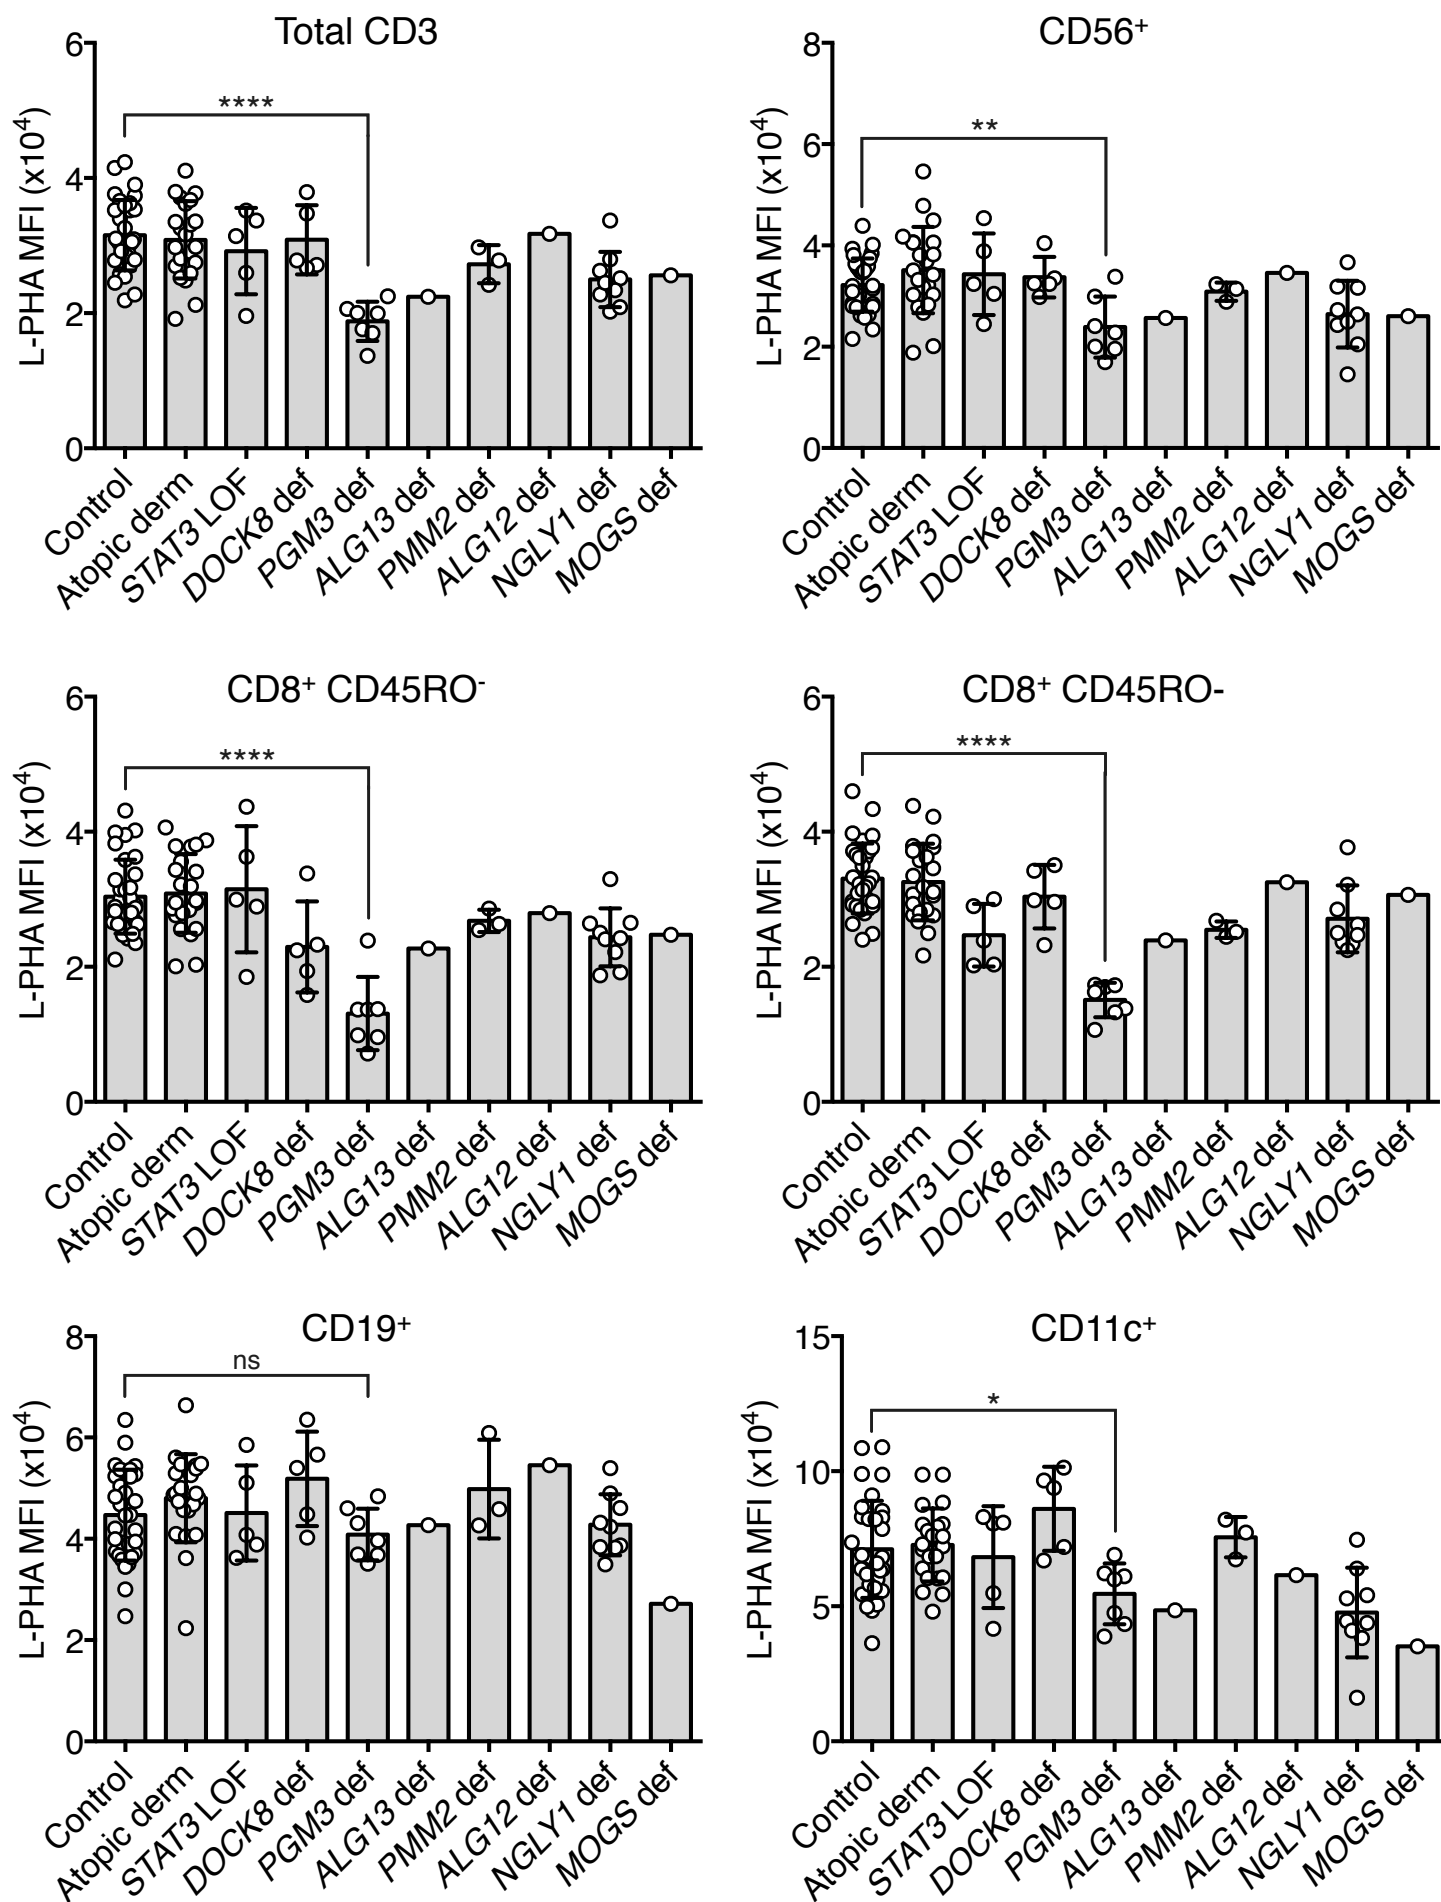

Figure E2.

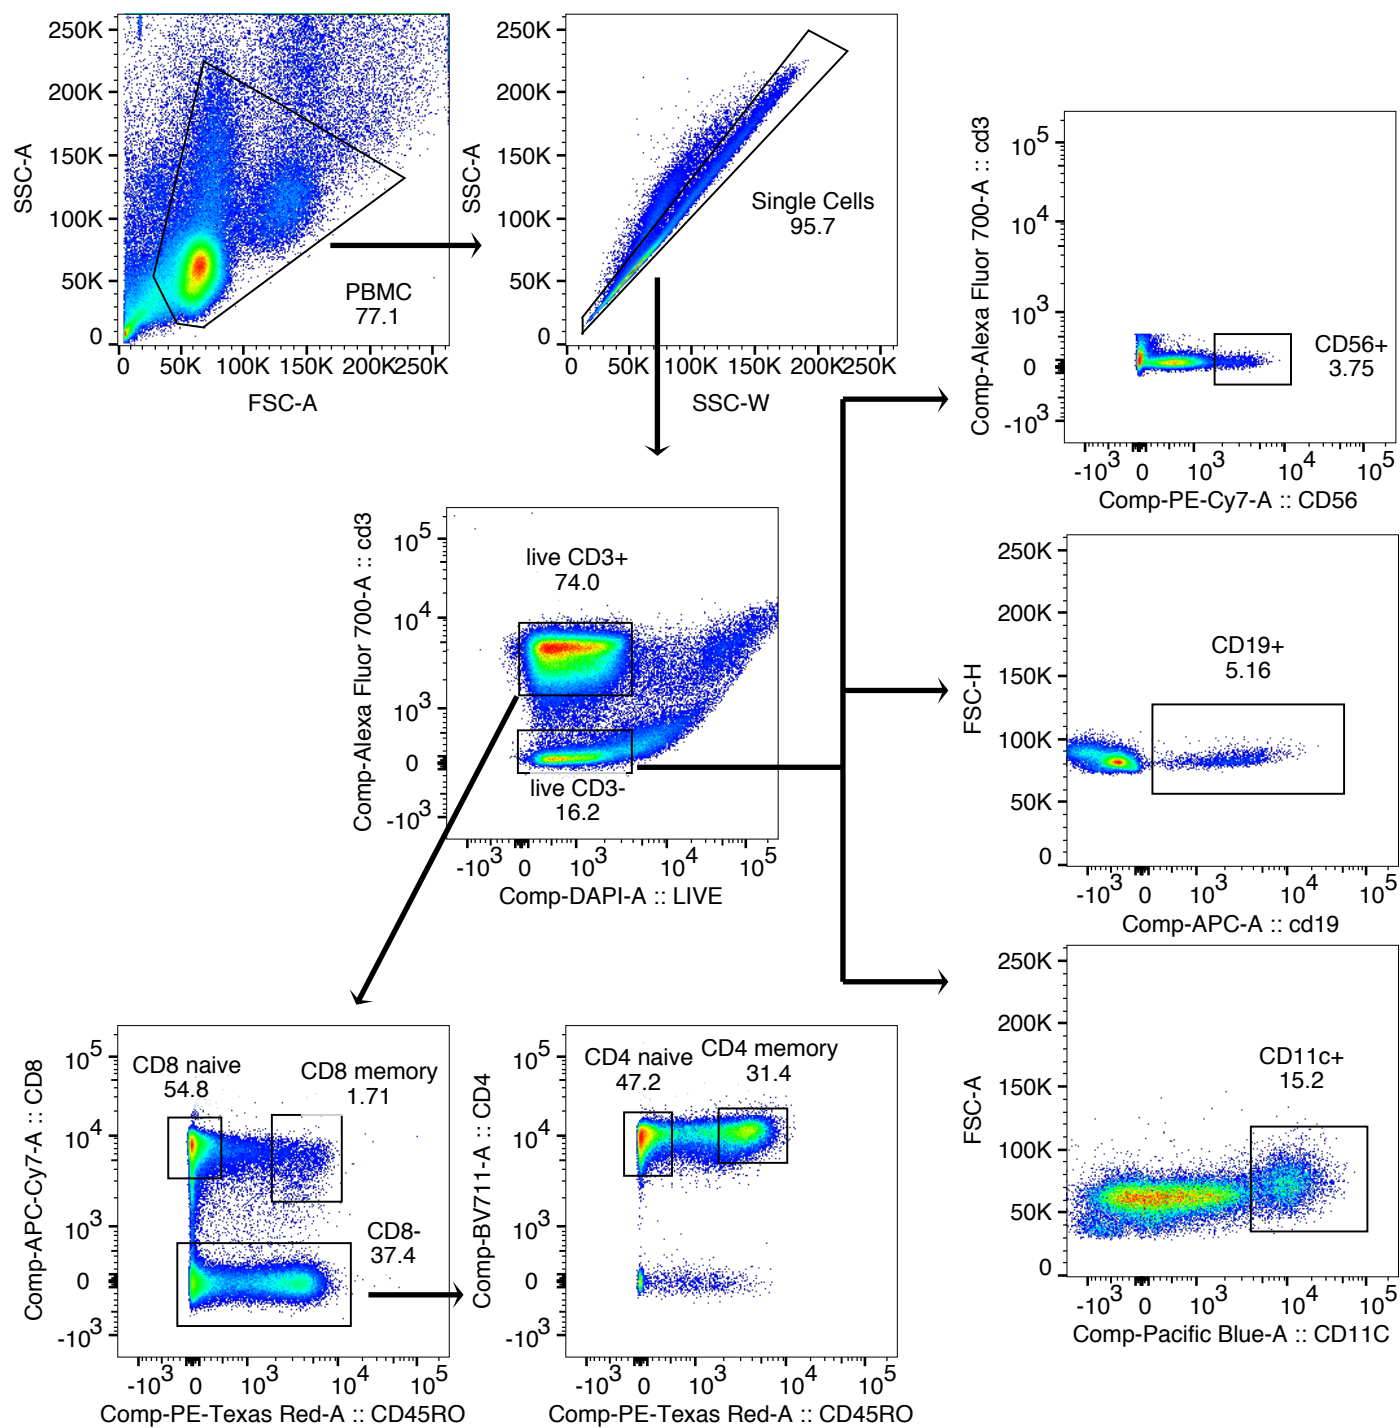

Figure E3.

A.

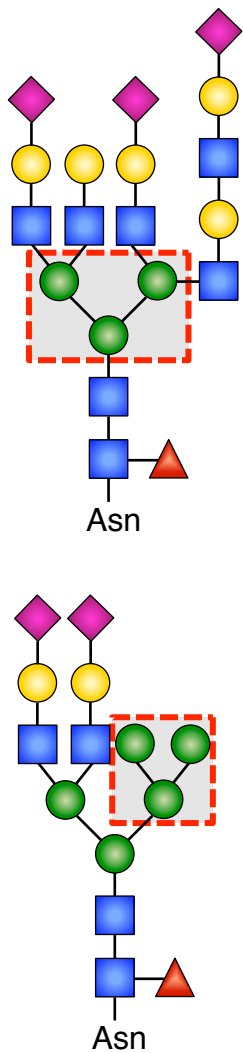

B.

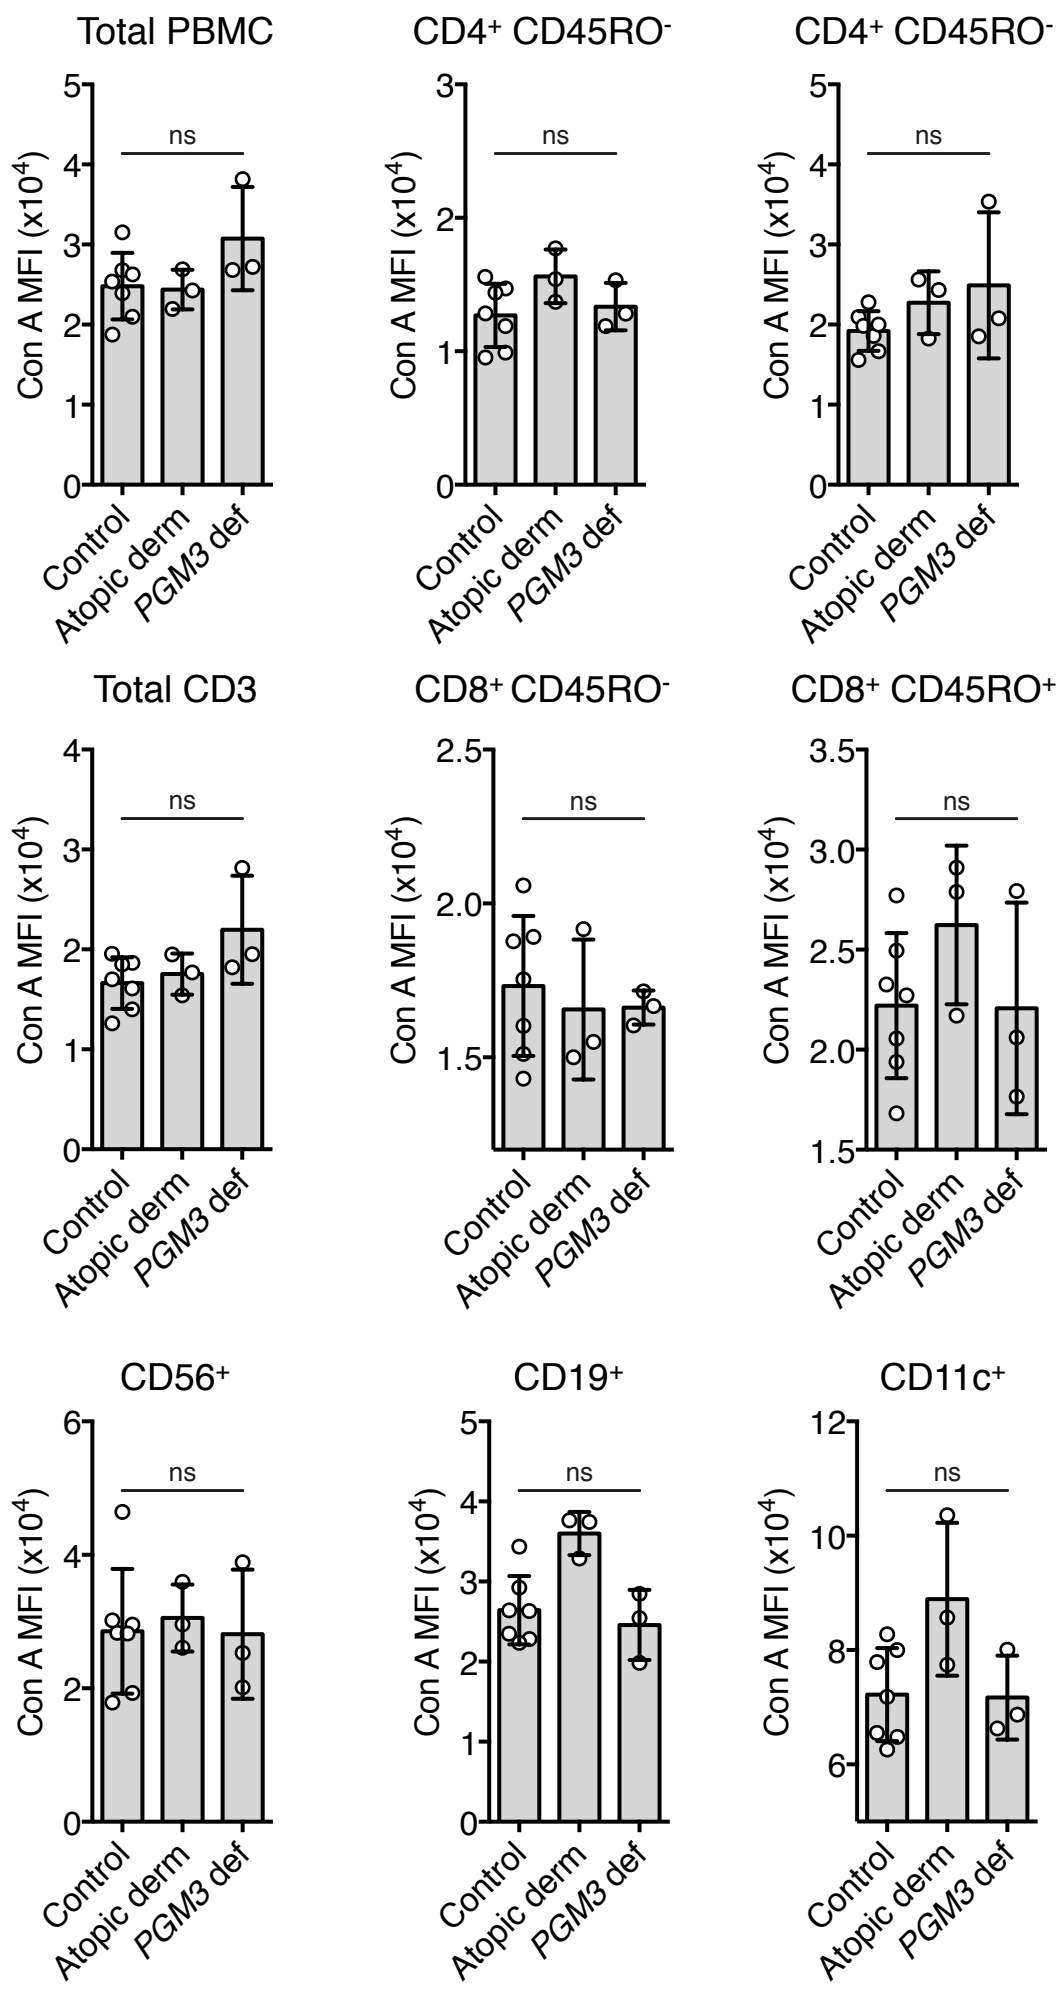

Supplement: NIHMS848596-supplement-supplement_1.pdf [file NIHMS848596-supplement-supplement_1.pdf]
